# Supplementary material for: Spatial and Temporal Analysis of the Stomach and Small-Intestinal Microbiota in Fasted Healthy Humans
Source: PubMed Central journal article supplement (PMC6416366; doi:10.1128/msphere.00126-19), 2019-03-13

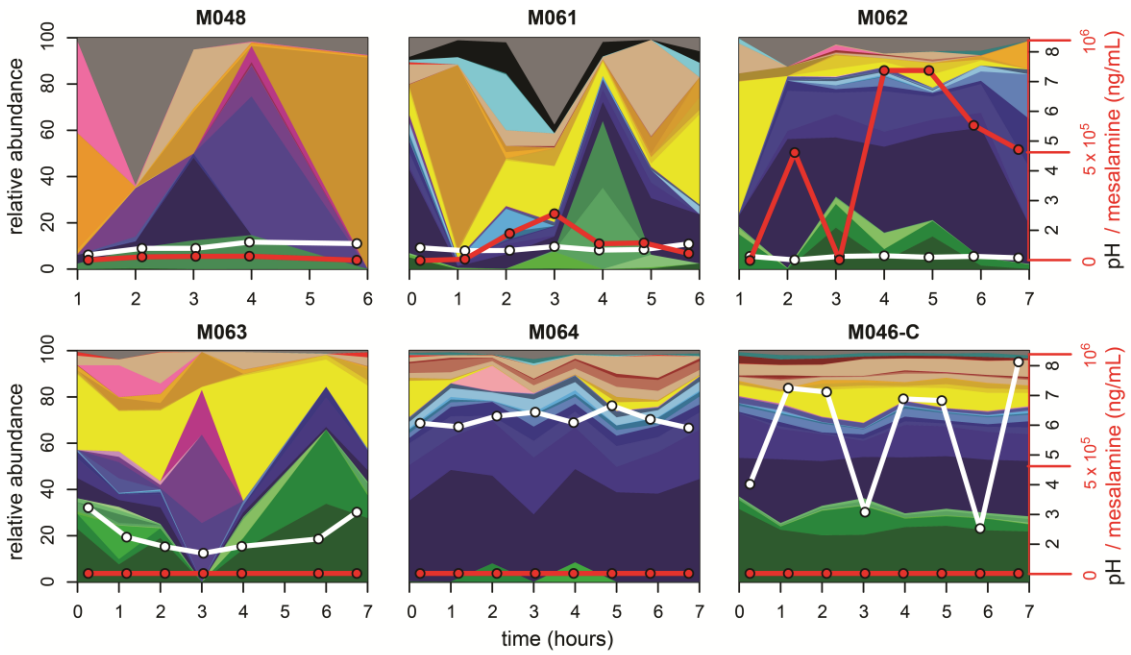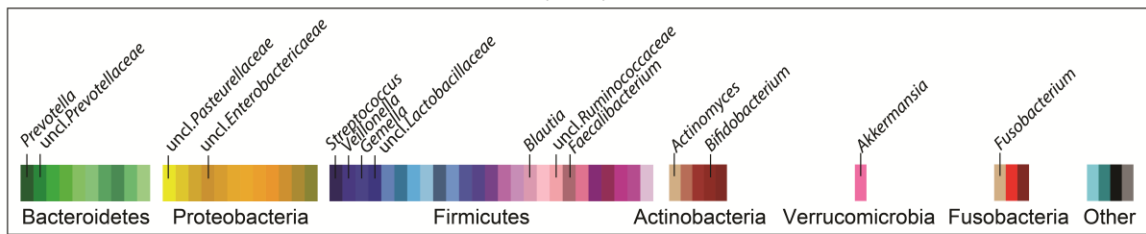

Supplement: mSphere.00126-19-sf002.pdf [file mSphere.00126-19-sf002.pdf]
